18 **Abstract**

19 **Context**

20 Warmer weather caused by climate change poses increasingly serious threats to the persistence  
21 of many species, but animals can modify behavior to mitigate at least some of the threats posed  
22 by warmer temperatures. Identifying and characterizing how animals modify behavior to avoid  
23 the negative consequences of acute heat will be crucial for understanding how animals will  
24 respond to warmer temperatures in the future.

25

26 **Objectives**

27 We studied the extent to which moose (*Alces alces*), a species known to be sensitive to heat,  
28 mitigates heat on hot summer days via multiple different behaviors: (1) reduced movement, (2)  
29 increased visitation to shade, (3) increased visitation to water, or (4) a combination of these  
30 behaviors.

31

32 **Methods**

33 We used GPS telemetry and a step-selection function to analyze movement and habitat selection  
34 by moose in northeastern Minnesota, USA.

35

36 **Results**

37 Moose reduced movement, used areas of the landscape with more shade, and traveled nearer to  
38 mixed forests and bogs during periods of heat. Moose used shade far more than water to  
39 ameliorate heat, and the most pronounced changes in behavior occurred between 15°C and 20°C.

40

41 **Conclusions**

42 Research characterizing the behaviors animals use to facilitate thermoregulation will aid  
43 conservation of heat-sensitive species in a warming world. The modeling framework presented  
44 in this study is a promising method for evaluating the influence of temperature on movement and  
45 habitat selection.

46

47 **Key words**

48 climate change, habitat selection, habitat use, lidar, moose (*Alces alces*), resource selection, step-  
49 selection function, thermal refugia

50

51

## 52 **Introduction**

53           Physiological performance peaks within a limited range of body temperatures in which  
54 molecular, cellular, and systemic processes operate optimally. Body temperatures outside this  
55 range impose functional constraints on these processes, including reductions in growth,  
56 reproduction, activity, and immune function (Pörtner and Farrell 2008). Nevertheless, animals  
57 routinely operate in environmental conditions that trigger suboptimal body temperatures (Boyles  
58 et al. 2011; Sunday et al. 2014). This conundrum underlies two long-standing questions in  
59 biological research: (1) How do animals mitigate suboptimal thermal conditions, and (2) how  
60 effective are those efforts at mitigation? Rapid and ongoing responses to global climate change  
61 by a multitude of animal species (Walther et al. 2002; Parmesan 2006; Hoegh-Guldberg and  
62 Bruno 2010) increase the urgency of answering these questions.

63           Animals can relax the constraints of limited ranges of thermal tolerance by modifying  
64 their behavior to reduce heat gain and dissipate heat at high temperatures. Such behavioral  
65 thermoregulation has a long history of study in biological research (Cowles and Bogert 1944),  
66 but this idea still offers fresh insight today. Animals can restrict movement to produce less  
67 metabolic heat (Stelzner 1988; Broders et al. 2012), alter posture to reduce heat gain from  
68 insolation or increase surface area to shed heat (Luskick et al. 1978; Bartholomew and Dawson  
69 1979), pant to lose heat via evaporation (Campos and Fedigan 2009; McCann et al. 2013), or  
70 visit thermal refugia (spaces that provide refuge from thermal stress caused by extreme  
71 temperatures [e.g., burrows, wallows, shade cover]; van Beest et al. 2012; Hovick et al. 2014;  
72 Kurylyk et al. 2015), among other behaviors. Identifying exactly which of these strategies  
73 animals use to behaviorally thermoregulate, how much these strategies buffer against adverse  
74 impacts of hot weather, and what costs animals incur to use these strategies is crucial for

75 understanding their ability to increase ranges of thermal tolerance, which in turn increases our  
76 understanding of how animals may adapt (or not) to increasing temperatures in a warmer future.

77         Recent advances in statistical modeling techniques provide opportunity to study  
78 behavioral thermoregulation in new ways. Step-selection functions (hereafter “SSFs”) are an  
79 extension of the resource selection function modeling framework that explicitly incorporates  
80 spatial and temporal animal movement characteristics to enable examination of fine-scale habitat  
81 selection and movement behavior at biologically realistic scales (Forester et al. 2009; Thurfjell et  
82 al. 2014; Duchesne et al. 2015). SSFs have primarily been used to model habitat selection  
83 (Thurfjell et al. 2014), but recent theoretical development has demonstrated that they can also be  
84 used to explicitly model movement behavior that changes in both space and time in relation to  
85 landscape features (Avgar et al. 2016; Prokopenko et al. 2017; Ladle et al. 2019). By including  
86 interaction terms between temperature, habitat covariates, and movement rates within SSFs, the  
87 relative importance of temperature-dependent animal behaviors—including both resource  
88 selection and movement rates—can be quantified in a single model.

89         We used the SSF modeling framework to examine behavioral thermoregulation in moose  
90 (*Alces alces*), a species known to be sensitive to heat. Moose have undergone substantial  
91 population declines across much of their southern range due in part to climate change (Lenarz et  
92 al. 2009; Rempel 2011; Monteith et al. 2015). Moose experience heat stress starting at  
93 temperatures as low as 14°C (Renecker and Hudson 1986) or 17°C (McCann et al. 2013) during  
94 the summer. Moose prevent heat stress on hot days by using water, shade, and decreased activity  
95 to shed heat via conduction and reduced exposure to radiation from the sun (Belovsky 1981;  
96 Dussault et al. 2004; Broders et al. 2012; Street et al. 2015; McCann et al. 2016). At coarse  
97 spatial and temporal scales, moose select for thermal cover (e.g., dense canopy in conifer forests)

98 during periods of high temperatures (Schwab and Pitt 1991; Demarchi and Bunnell 1995; van  
99 Beest et al. 2012; Melin et al. 2014; Street et al. 2016; but see Lowe et al. 2010). However,  
100 earlier studies have not established the relative importance of multiple different heat amelioration  
101 strategies (e.g., seeking shade vs. reducing movement vs. visiting water) or identified thresholds  
102 at which behavioral thermoregulation alters habitat selection.

103 To evaluate how moose modify fine-scale habitat selection and movement patterns as  
104 temperatures increase, we used an SSF to assess the effects of temperature on movement and  
105 resource selection. We examined empirical support for a single model consisting of temperature  
106 and interactions with variables likely to be important for moose thermoregulation. This model  
107 enabled us to quantify the importance of several ways moose may alter behavior to  
108 thermoregulate when it is hot: moose (1) decrease movement rates to decrease metabolic heat  
109 production, (2) increase use of shade to decrease heat gain from solar radiation, (3) increase use  
110 of water to increase heat loss via conduction, convection, and evaporation, or (4) use some  
111 combination of each of these.

112

## 113 **Materials and Methods**

### 114 **Study area**

115 We conducted our study in northeastern Minnesota, USA (Fig. 1). Federal, state, county,  
116 and tribal public lands managed for timber harvest and recreation make up >80% of property  
117 ownership in the area. The region is a sub-boreal transition zone between northern hardwood  
118 forests in the south to Canadian boreal forests in the north (Pastor and Mladenoff 1992). Upland  
119 forests are primarily composed of white, red, and jack pine (*Pinus strobus*, *P. resinosa*, and *P.*  
120 *banksiana*), aspen (*Populus tremuloides*), paper birch (*Betula papyrifera*), and balsam fir (*Abies*

121 *balsamea*). Black spruce (*Picea mariana*), tamarack (*Larix laricina*), and northern white cedar  
122 (*Thuja occidentalis*) dominate wet lowland forests. Mean minimum and maximum temperatures,  
123 respectively, are -16.5°C and -5.5°C for the month of January and 12.6°C and 24.0°C for the  
124 month of July at the Beaver Bay weather station on the southern edge of our study area (National  
125 Oceanic and Atmospheric Administration). Snow cover is typically present from December to  
126 April, with mean annual snowfall ranging between 150 – 240 cm (Minnesota Department of  
127 Natural Resources).

128

### 129 **Animal Capture and GPS Telemetry**

130 We captured moose by darting them from helicopters (Quicksilver Air, Inc., Fairbanks,  
131 Alaska, USA) during the winters of 2011 and 2012. Darts used to sedate moose contained 1.2 ml  
132 (4.0 mg ml<sup>-1</sup>) carfentanil citrate and 1.2 ml (100 mg ml<sup>-1</sup>) xylazine HCl, and we used 7.2 ml (50  
133 mg ml<sup>-1</sup>) naltrexone HCl and 3 ml (5 mg ml<sup>-1</sup>) yohimbine HCl as antagonists (Roffe et al. 2001;  
134 Lenarz et al. 2009). We fitted immobilized moose with global positioning system (GPS) collars  
135 (Lotek Wireless, Inc., Newmarket, Ontario, Canada). Animal capture and handling protocols met  
136 American Society of Mammalogists recommended guidelines (Sikes and Animal Care and Use  
137 Committee of the American Society of Mammalogists 2011) and were approved by the  
138 University of Minnesota Animal Care and Use Committee (Protocol Number: 1309-30915A).

139 Collars were programmed to record locations every 20 minutes and to drop off moose at  
140 the end of expected battery life (2 years). We retained GPS locations with 3-D fixes or 2-D fixes  
141 with dilution of precision values  $\leq 5$  (Lewis et al. 2007) and removed locations that were not  
142 biologically possible (i.e., removing locations where the distance between locations would have  
143 exceeded the distance a moose could have moved in a 20-minute period, assuming a maximum

144 speed of 30-km/hour). Data used in this analysis include only locations between May 1 and  
145 September 31—dates that coincide with average daily maximum temperatures above the  
146 threshold believed to induce heat stress for moose (Renecker and Hudson 1986). Location and  
147 activity data within 2 weeks of death or collar failure were censored from our data, and only full  
148 months of data were used in analysis. Our analysis included 153 moose-months from 24 moose.  
149 Moose were adults at capture except for one moose that was a yearling (1.8 years old), and 17 of  
150 24 moose were females.

151

## 152 **Model Covariates**

153 Because shade is difficult to directly calculate over large areas at fine scales and varies at  
154 any given location on daily and annual cycles, we used canopy vegetation density as a proxy for  
155 shade. Canopy vegetation density was estimated using airborne lidar data. Lidar is an active,  
156 laser-based remote sensing technology that provides detailed information on topography and  
157 vegetation structure (Vierling et al. 2008; Davies and Asner 2014). Lidar data were collected  
158 over our entire study area during leaf-off conditions in May 2011 as part of the Minnesota  
159 Elevation Mapping project (Minnesota Geospatial Information Office). Lidar data were collected  
160 from a fixed wing airplane at an altitude of 2,000-2,300 m above ground level using discrete-  
161 return laser scanning systems (ALS60, ALS70, or Optech GEMINI). Side overlap was 25% with  
162 a scan angle of  $\pm 20^\circ$ . Nominal point spacing and pulse density varied due to incomplete overlap  
163 of adjacent flight-lines. Average nominal pulse density was 1 pulse/m<sup>2</sup>. We calculated height of  
164 discrete returns above ground by subtracting ground elevation based on a lidar-derived Digital  
165 Elevation Model from the return elevation. Lidar data met the National Standard for Spatial



166 Database Accuracy and had a vertical accuracy RMSE of 5.0 cm and a horizontal accuracy of  
167 1.16 m.

168 We estimated canopy vegetation density as the proportion of all returns that were  $\geq 3$  m  
169 above ground. Lidar-derived canopy vegetation density estimates were summarized in a 30 x 30  
170 m grid that aligned with National Land Cover Database (NLCD) raster data to ensure  
171 consistency across data layers in GIS. We used FUSION software to create the lidar-derived  
172 canopy vegetation density raster (McGaughey 2016). For the sake of simplicity, we hereafter  
173 refer to lidar-derived canopy vegetation density as “shade”.

174 Vegetation cover types were determined using the 2011 National Land Cover Database  
175 (NLCD) (Homer et al. 2015). NLCD is a remotely sensed dataset of 16 land cover classes  
176 created from Landsat Thematic Mapper with 30 m spatial resolution. We extracted 5 vegetation  
177 cover types that may offer thermal refuge—woody wetland, hereafter called bog; emergent  
178 herbaceous wetland, hereafter called marsh; open water; conifer forests; and mixed forests. Each  
179 of these cover types offers different amounts of thermal refuge via different mechanisms (Table  
180 1). Each cover type also offers different amounts of forage. Since moose primarily eat the leaves  
181 of deciduous shrubs and saplings  $< 3$  m tall during summer, forage quantity decreases as the  
182 amount of shade and proportion of conifers increases. Selection of cover types may be dependent  
183 on proximity to other cover types, and GPS error may lead to underestimation of selection of  
184 cover types covering small areas (Conner et al. 2003; Martin et al. 2018). We therefore  
185 calculated the Euclidean distance of each pixel in our study area from each of our chosen  
186 vegetation cover types using ArcMap 10.4 (Esri, Redlands, California, USA). Euclidean  
187 distances were 0 when an animal was within the land cover type of interest.

188           Temperature data were obtained from two weather stations within our study area (KBFW  
189   in Silver Bay and KCKC in Grand Marais; MesoWest; Fig. A1). These stations are operated by  
190   the National Oceanic and Atmospheric Administration according to national standards and report  
191   temperatures at 20-minute intervals. Moose locations were individually matched with the nearest  
192   weather station (by distance) and nearest temperature recording (by time). Moose locations were  
193   on average 33 km from the nearest weather station and 7 minutes from the closest recorded  
194   weather observation in time.

195

## 196   **Statistical Analysis**

197           We used a step-selection function (SSF) to model moose resource selection and  
198   movement behavior. For our SSF, we selected available points using a parameterized Weibull  
199   distribution of step lengths and the observed distribution of turn angles of the animals in our data  
200   set. We paired 20 available locations to each used location (i.e., 21 points per stratum). Our final  
201   data set contained 311,521 steps taken by 24 moose. We used conditional logistic regression to  
202   fit the SSF containing our variables of interest (listed in Table 1) and interactions between each  
203   variable and ambient temperature. We included step length (i.e., distance between consecutive  
204   fixes) both to reduce bias in selection estimates (Forester et al. 2009) and to explicitly model its  
205   interaction with another variable of interest (Avgar et al. 2016; Prokopenko et al. 2017; Ladle et  
206   al. 2019). Interaction coefficients detail how temperature influences step length and selection of  
207   cover types at differing temperatures. Because step lengths vary in a regular pattern over the  
208   course of each 24-hour period (Fig. A2), we adjusted step lengths prior to inclusion in the model  
209   by subtracting the observed step length from the average step length at each given time of day.  
210   Failure to adjust for crepuscular activity peaks could lead to consistent positive bias in movement

211 rates at low (morning) and intermediate (evening) temperatures. We included one-way  
212 interactions between each covariate and temperature (°C). Because temperature was constant  
213 within strata, it was considered only as an interaction term. The full final model is listed below:

214

215 Use ~ Shade + dBog + dMarsh + dWater + dConifer + dMixed + StepLength + Temp\*Shade +  
216 Temp\*dBog + Temp\*dMarsh + Temp\*dWater + Temp\*dConifer + Temp\*dMixed +  
217 Temp\*StepLength,

218

219 where “\*” denotes interactions between variables. We used generalized estimating equations  
220 (GEEs) to obtain robust standard errors among animal-days that reduce Type I error caused by  
221 pseudoreplication (Fortin et al. 2005; Craiu et al. 2008; Duchesne et al. 2010), and checked to  
222 ensure that VIFs between main effects were adequately low (O’Brien 2007; Dormann et al.  
223 2013). We then conducted k-fold (k=5) cross-validation on our final model and calculated  
224 Spearman rank correlation (mean of 50 replications) to evaluate model fit (based on the methods  
225 of Fortin et al. (2009). Finally, we rarified data to 1-, 2-, and 4-hour intervals to determine the  
226 minimum interval between GPS locations required to detect biologically significant interactions.  
227 All analyses were conducted using R statistical software (R Core Team 2018).

228

## 229 **Results**

### 230 **Moose Movement and Resource Selection**

231 We found empirical support for four interaction terms (StepLength\*Temp, Shade\*Temp,  
232 Bog\*Temp, MixedForest\*Temp) in our step-selection function (Table 2), indicating that  
233 temperature significantly altered movement rate and selection for shade, bog, and mixed forest.

234 We did not detect empirical support for interactions between temperature and distance to marsh,  
235 temperature and distance to open water, or temperature and distance to conifer forest. Of these  
236 variables with interaction terms whose 95% CIs overlapped zero, only the main effect for  
237 distance to conifer forest was significant. Regardless of temperature, moose selected areas  
238 further from conifer forest (RSS = 1.553; 95% CI = 1.133-2.130). The main effects for distance  
239 to marsh and distance to open water were not significant. Moose neither selected nor avoided  
240 areas near marsh or open water. Habitat use by moose was consistent throughout our study  
241 period (i.e., month-to-month changes in distance to vegetation cover types were small; Fig. A3).

242 Moose decreased movement rates at hotter temperatures (Fig. 2A). The mean step length  
243 at all temperatures above 20°C was below the overall mean step length controlling for time of  
244 day. At each standardized step length > 0 m (i.e., steps that were longer than average for a given  
245 time of day), the odds of moose taking a step of that length was higher at 0°C than at 15°C, and  
246 higher at 15°C than at 30°C. At 0°C, the odds that moose would move 100 m more than average  
247 in 20 minutes were substantially higher (RSS = 1.074; 95% CI = 1.025-1.126) than at 15°C (RSS  
248 = 0.849; 95% CI = 0.777-0.928), which were in turn substantially higher than at 30°C (RSS =  
249 0.672; 95% CI = 0.590-0.765).

250 Moose spent more time in shade at hotter temperatures (Fig. 2B). Relative selection  
251 strength increased with increasing vegetative cover at 30°C, while it decreased with increasing  
252 vegetative cover at 0°C and 15°C, indicating that moose sought shade at high temperatures while  
253 avoiding it at lower temperatures. At 0°C, the odds that moose would move into a pixel with  
254 75% vegetative cover were substantially lower (RSS = 0.265; 95% CI = 0.239-0.295) than at  
255 15°C (RSS = 0.640; 95% CI = 0.523-0.782), which were in turn substantially lower than at 30°C  
256 (RSS = 1.542; 95% CI = 1.148-2.073).

257 Despite avoiding bogs at colder temperatures, moose traveled closer to bogs at hotter  
258 temperatures (Fig. 2C). The odds that moose were far from bogs was higher at 0°C (RSS =  
259 1.407; 95% CI = 1.177-1.681 at 500 m) than at 15°C (RSS = 0.818; 95% CI = 0.577-1.160 at 500  
260 m), and higher at 15°C than at 30°C (RSS = 0.476; 95% CI = 0.283-0.800 at 500 m).

261 Moose selected for shorter distances to mixed forest when it was hot than when it was  
262 cold (Fig. 2D). The odds that moose were far from mixed forest was higher at 0°C (RSS = 1.064;  
263 95% CI = 0.888-1.274 at 500 m) than at 15°C (RSS = 0.795; 95% CI = 0.560-1.127 at 500 m) or  
264 30°C (RSS = 0.594; 95% CI = 0.353-0.998 at 500 m), though odds did not significantly differ  
265 between 15°C and 30°C.

266

## 267 **Model validation**

268 K-fold cross-validation of our model demonstrated that our model was substantially better than  
269 random at predicting where moose moved—the mean Spearman rank correlation coefficient was  
270 0.47 for observed steps.

271

## 272 **Effects of temporal scale on interactions**

273 The interactions we found in our data diminish substantially if GPS locations are rarified so that  
274 locations occur at longer intervals. When 20-min interval GPS data are rarified to 1-hr, 2-hr, and  
275 4-hr intervals and used to fit the same SSF, interactions become progressively less biologically  
276 meaningful (Fig. A4). As the intervals increase, differences across temperatures for step length,  
277 shade, and distance to bog become minimal. Differences across temperatures for distance to  
278 mixed forest shrink, but more gradually.

279

## 280 **Discussion**

281           In this paper, we developed a modeling framework to test multiple competing (but not  
282 mutually exclusive) hypotheses on behavioral responses by animals to heat. We used this  
283 framework to model behavioral responses by moose, an ungulate known to be sensitive to heat.  
284 Moose altered both movement and habitat selection to behaviorally thermoregulate during hot  
285 periods. Moose reduced movement and moved nearer to or stayed within shade, bogs, and mixed  
286 forest at high heat, even while avoiding shade and bogs at cooler temperatures (Fig. 2). This  
287 pattern links previous findings of separate studies. First, moose prefer to forage in areas with low  
288 canopy cover because canopy cover is generally inversely related to forage availability (Lone et  
289 al. 2014). Second, moose prefer to use bed sites under dense forest canopy in wet lowland forests  
290 during the day (McCann et al. 2016), where moose have access to less forage but more  
291 protection against heat gain from solar radiation and more capacity to lose heat to wet ground via  
292 conduction. Moose therefore face a steep tradeoff during periods of heat—areas that are good for  
293 foraging may not be good for avoiding heat. Selection for shade and shorter step lengths as  
294 temperatures increase indicates that moose forego foraging in favor of bedding down under  
295 shade as temperatures increase. Earlier studies have documented moose shifting activity to  
296 cooler evenings and nights on hot days (Dussault et al. 2004; Montgomery et al. 2019), which is  
297 consistent with this trade-off.

298           The vegetation cover types used more by moose during warm weather further indicate  
299 that moose face a tradeoff between foraging and thermoregulation during periods of heat. In  
300 general, moose are more likely to find greater quantities of forage in cover types that do not  
301 provide thermal cover, while cover types that provide thermal cover are less likely to provide  
302 forage. For example, upland mixed forest has some available forage, but forage availability is

303 highest in this cover type in young forests with little canopy cover. Similarly, bogs in Minnesota  
304 are largely populated by black spruce, tamarack, and alder, all of which can provide thermal  
305 cover but are unpalatable for moose. Birch (*Betula* spp.) and willow (*Salix* spp.) are more  
306 palatable and occasionally grow in bogs in Minnesota, but rarely at densities high enough to  
307 compensate for unpalatable species dominating the canopy layer.

308 Further studies would be helpful for demonstrating how common trade-offs between  
309 thermoregulation and foraging are among ungulates. Reductions in activity during periods of  
310 heat are widespread among ungulates, having been documented in a diverse array of ungulates  
311 that include moose, mule deer (*Odocoileus hemionus*; Sargeant et al. 1994), bighorn sheep (*Ovis*  
312 *canadensis*; Alderman et al. 1989), Alpine ibex (*Capra ibex*; Aublet et al. 2009; Mason et al.  
313 2017), Alpine chamois (*Rupicapra rupicapra*; Mason et al. 2014), common eland (*Taurotragus*  
314 *oryx*; Shrestha et al. 2014), black wildebeest (*Connochaetes gnou*; Vrahimis and Kok 1993), blue  
315 wildebeest (*Connochaetes taurinus*; Shrestha et al. 2014), impala (*Aepycerus melampus*;  
316 Shrestha et al. 2014), and greater kudu (*Tragelaphus strepsiceros*; Owen-Smith 1998).  
317 Nevertheless, the relative importance of reducing activity is not often compared directly to other  
318 strategies used by ungulates to reduce heat stress, and reductions in activity may not always  
319 result in reduced foraging opportunity, which depends on landscape structure (i.e., distance  
320 between foraging sites and bed sites with adequate thermal cover).

321 Studies on the contexts in which tradeoffs between foraging and thermoregulation  
322 become particularly acute will also be important in a warming future. Environment and  
323 nutritional condition may play a role in shaping such tradeoffs. For example, North American elk  
324 (*Cervus canadensis*) prioritize reducing thermoregulatory costs over forage quality in low-  
325 elevation desert populations but not in high-elevation mountain populations, and individuals with

326 low fat reserves prioritize reducing thermoregulatory costs over forage quality most strongly  
327 (Long et al. 2014). Body size may also play a role in modulating tradeoffs between foraging and  
328 thermoregulation. Adult male Alpine ibex, which are substantially larger than females, reduce  
329 time spent foraging more than females when it is hot (Aublet et al. 2009). Common eland and  
330 blue wildebeest reduce afternoon activity all year round, but smaller impala reduce afternoon  
331 activity only during the summer (Shrestha et al. 2014). The effects of environmental variation,  
332 nutritional condition, or body size on thermoregulatory behavior could be answered in larger data  
333 sets using our modeling framework by building SSFs for each individual and testing for  
334 statistical effects of a variable of interest (e.g., fat reserves, body size) on the RSS of a variable  
335 of interest (e.g., step length at a given high temperature).

336         Determining the relative importance of features on the landscape for mitigating heat  
337 stress will also be important in a warming future. In our study, moose used shade far more than  
338 water to ameliorate heat during hot weather. Moose are commonly observed in bodies of water,  
339 and anecdotal evidence suggests that moose use water to shed heat (Schwab and Pitt 1991;  
340 Demarchi and Bunnell 1995). Our analysis, however, indicates that moose do not often use open  
341 water and marsh to mitigate heat stress; they prefer to seek shadier vegetation cover types.  
342 Nevertheless, they do increase use of woody bogs—where both shade and some water are  
343 usually available—as temperatures increase. This is consistent with a previous study (McCann et  
344 al. 2016) that found that moose prefer bed sites with both canopy cover and relatively high soil  
345 moisture. Other ungulates may use different features of the landscape to mitigate heat stress. For  
346 example, mountain goats (*Oreamnos americanus*) move nearer to persistent snow cover during  
347 hot weather, but do not seek shade (Sarmiento et al. 2019). Step-selection functions that include



348 interactions with temperature offer a simple way to test for the relative importance of a wide  
349 variety of different landscape features for thermoregulation.

350         Frequent GPS locations enabled us to detect responses to heat by moose and may explain  
351 why previous attempts to characterize moose movement patterns failed to reveal a strong  
352 relationship between temperature and movement rates (Dussault et al. 2004; Montgomery et al.  
353 2019). Moose spend about half of their day foraging during the summer, with foraging bouts  
354 interspersed by periods of rumination at bed sites. Periods of rest and rumination are typically  
355 distinct and occur at regular intervals of roughly 2 hours (Renecker and Hudson 1989; Moen et  
356 al. 1996). As the interval between GPS locations increases, the chance that both ambulatory  
357 foraging bouts and stationary ruminating bouts are aggregated into a single GPS fix increases,  
358 which homogenizes step lengths (Moen et al. 1996). Frequent GPS locations reduce the  
359 probability of this happening. Indeed, if our location data is rarified to 1-, 2-, and 4-hour  
360 intervals, effect sizes of interactions between temperature and movement rates are progressively  
361 reduced (Fig. A4). Because many species have idiosyncratic movement behaviors, movement  
362 studies may require intervals between GPS locations within a specific range to answer research  
363 questions concerning animal movement. This is an important consideration for researchers  
364 planning studies of animal movement. Researchers should carefully consider the frequency of  
365 GPS locations before deploying GPS collars and recognize that GPS data that is too sparse may  
366 not be suitable for studies of some movement behaviors.

367         Our analysis can directly inform management and conservation actions for wildlife.  
368 Many moose populations at the southern edge of their distribution (including our study area)  
369 have undergone dramatic declines in the past decade. Our results suggest that in a warmer future  
370 proximity to shade will strongly influence habitat suitability for moose in areas with abundant

371 forage due to timber harvest and other anthropogenic disturbance. Moose will likely benefit from  
372 management action to explicitly promote maintenance of shade near large patches of forage.  
373 Because moose prioritize shade over forage when it is hot, moose will likely not feed in large  
374 forest openings on hot days (though moose may feed in unshaded forest openings at night  
375 [Dussault et al. 2004]). Moose will likely spend more time foraging in forest openings with  
376 patches of canopy cover than in large homogeneous forest openings. For example, most of the  
377 forage in large clearcuts may be inaccessible to moose during hot periods unless the clearcuts  
378 contain “reserve patches”, or interior islands or fingers of forest extending into the clearcut.  
379 These reserve patches will likely be most helpful for moose if they consist of bog or mixed  
380 forest.

381         Some measure of fitness (or a proxy for fitness) would make it possible to directly link  
382 behavioral strategies to a population-level response to large-scale drivers like climate change.  
383 Although behavioral thermoregulation mitigates some metabolic costs of hot weather, forgoing  
384 foraging to avoid high body temperatures may result in decreased fat reserves, lower fitness, and  
385 ultimately in population declines compared to a cooler baseline scenario where moose do not  
386 need to behaviorally thermoregulate. Although we did not link behavior to fitness in this study,  
387 identifying and quantifying patterns of behavior allows researchers to explicitly test for effects  
388 on fitness in subsequent studies. For example, development of conceptual and modeling  
389 frameworks to identify and quantify “green wave surfing” behavior (by which animals migrate  
390 along paths of rapidly greening forage) in migratory ungulates (Bischof et al. 2012; Merkle et al.  
391 2016; Aikens et al. 2017) allowed researchers to later quantify a connection between green wave  
392 surfing and fitness (Middleton et al. 2018). Our study could be used as a foundation for further  
393 analyses along these lines, or to parameterize mechanistic models of moose energetic balances

394 under various climate scenarios, land management strategies, or disturbance regimes to project  
395 the outcomes of conservation actions taken to benefit moose.

396 Our analysis demonstrates that advances in animal tracking, remote sensing, and  
397 modelling techniques allow us to study responses by free-ranging animals to weather in the field  
398 at finer scales than previously possible. SSFs in particular are a valuable tool to answer questions  
399 concerning behavioral responses by free-ranging animals to changes in weather in a relatively  
400 simple and intuitive way. Because SSFs estimate selection conditionally at each GPS location,  
401 each location or step can be connected with a distinct time and spatial location, enabling  
402 inference on how animals change movement and habitat selection in space and time in response  
403 to specific stimuli. SSFs have been used to characterize animal movements in relation to  
404 landscape features, such as grizzly bear response to human activity (Ladle et al. 2019) and elk  
405 and African wild dog response to roads (Abrahms et al. 2016; Prokopenko et al. 2017). Likewise,  
406 SSFs that incorporate interactions between temperature and other variables of interest can  
407 characterize changes in movement behavior and habitat use in response to differences in  
408 temperature.

409 In conclusion, moose altered both movement and habitat selection to behaviorally  
410 thermoregulate during hot periods by reducing movement rates and increasing use of shaded  
411 vegetation cover types that they avoided at cooler temperatures. Moose did not regularly use  
412 water sources that lack canopy cover to shed heat. Moose face a tradeoff between forage and  
413 thermal cover at high temperatures and forego foraging in favor of seeking thermal cover.  
414 Behavior changed at thresholds near (though somewhat above) previously documented heat  
415 stress thresholds (Renecker and Hudson 1986; McCann et al. 2013): step lengths decreased at  
416 temperatures above 20°C, and selection patterns for shade reversed above 15°C. Future research

417 characterizing strategies for behavioral thermoregulation and consequences of those strategies  
418 for fitness will aid conservation in a warming world, for both moose and other heat-sensitive  
419 species.

420

## 421 **Acknowledgements**

422 Many thanks to B. Olson, W. Chen, and others who helped collect field data, as well as J. Rick,  
423 B. Brito, F. Molina, B. Maitland, S. Esmaeili, and J. Goheen for providing helpful comments on  
424 pre-submission drafts of this manuscript. This study was funded by Minnesota's Clean Water,  
425 Land, and Legacy Amendment, USGS-NPS Natural Resources Preservation Protection fund,  
426 Voyageurs National Park, Minnesota's Environmental and Natural Resources Trust Fund, the  
427 University of Minnesota-Duluth Integrated Biosciences graduate program, and the University of  
428 Wyoming Department of Zoology and Physiology.

429

## 430 **Author Contributions**

431 JA and RM conceived and designed the study; RM collected the data; JA, MJ, and JM analyzed  
432 the data; JA led the writing of the manuscript. All authors contributed critically to manuscript  
433 drafts and gave final approval for publication.

434

## 435 **Data Availability**

436 Data and R scripts will be archived on *Zenodo* when this manuscript is accepted for publication.

437

## 438 **References**

- 439 Abrahms B, Jordan NR, Golabek KA, et al (2016) Lessons from integrating behaviour and  
440 resource selection: activity-specific responses of African wild dogs to roads. *Anim*  
441 *Conserv* 19:247–255. <https://doi.org/10.1111/acv.12235>
- 442 Aikens EO, Kauffman MJ, Merkle JA, et al (2017) The greenscape shapes surfing of resource  
443 waves in a large migratory herbivore. *Ecol Lett* 20:741–750.  
444 <https://doi.org/10.1111/ele.12772>
- 445 Alderman JA, Krausman PR, Leopold BD (1989) Diel activity of female desert bighorn sheep in  
446 western Arizona. *J Wildl Manage* 53:264–271. <https://doi.org/10.2307/3801345>
- 447 Aublet J-F, Festa-Bianchet M, Bergero D, Bassano B (2009) Temperature constraints on  
448 foraging behaviour of male Alpine ibex (*Capra ibex*) in summer. *Oecologia* 159:237–  
449 247. <https://doi.org/10.1007/s00442-008-1198-4>
- 450 Avgar T, Potts JR, Lewis MA, Boyce MS (2016) Integrated step selection analysis: bridging the  
451 gap between resource selection and animal movement. *Methods Ecol Evol* 7:619–630.  
452 <https://doi.org/10.1111/2041-210X.12528>
- 453 Bartholomew GA, Dawson WR (1979) Thermoregulatory behavior during incubation in  
454 Heermann’s gulls. *Physiol Zool* 52:422–437.  
455 <https://doi.org/10.1086/physzool.52.4.30155934>
- 456 Belovsky GE (1981) Optimal activity times and habitat choice of moose. *Oecologia* 48:22–30.  
457 <https://doi.org/10.1007/BF00346984>
- 458 Bischof R, Loe LE, Meisingset EL, et al (2012) A migratory northern ungulate in the pursuit of  
459 spring: jumping or surfing the green wave? *Am Nat* 180:407–424.  
460 <https://doi.org/10.1086/667590>

- 461 Boyles JG, Seebacher F, Smit B, McKechnie AE (2011) Adaptive thermoregulation in  
462 endotherms may alter responses to climate change. *Integr Comp Biol* 51:676–690.  
463 <https://doi.org/10.1093/icb/icr053>
- 464 Broders HG, Coombs AB, McCarron JR (2012) Ecothermic responses of moose (*Alces alces*) to  
465 thermoregulatory stress on mainland Nova Scotia. *Alces* 48:53–61
- 466 Campos FA, Fedigan LM (2009) Behavioral adaptations to heat stress and water scarcity in  
467 white-faced capuchins (*Cebus capucinus*) in Santa Rosa National Park, Costa Rica. *Am J*  
468 *Phys Anthropol* 138:101–111. <https://doi.org/10.1002/ajpa.20908>
- 469 Conner LM, Smith MD, Burger LW (2003) A comparison of distance-based and classification-  
470 based analyses of habitat use. *Ecology* 84:526–531. [https://doi.org/10.1890/0012-](https://doi.org/10.1890/0012-9658(2003)084[0526:ACODBA]2.0.CO;2)  
471 [9658\(2003\)084\[0526:ACODBA\]2.0.CO;2](https://doi.org/10.1890/0012-9658(2003)084[0526:ACODBA]2.0.CO;2)
- 472 Cowles RB, Bogert CM (1944) A preliminary study of the thermal requirements of desert  
473 reptiles. *Bull Am Nat Hist* 83:261–296
- 474 Craiu RV, Duchesne T, Fortin D (2008) Inference methods for the conditional logistic regression  
475 model with longitudinal data. *Biometrical J* 50:97–109.  
476 <https://doi.org/10.1002/bimj.200610379>
- 477 Davies AB, Asner GP (2014) Advances in animal ecology from 3D-LiDAR ecosystem mapping.  
478 *Trends Ecol Evol* 29:681–691. <https://doi.org/10.1016/j.tree.2014.10.005>
- 479 Demarchi MW, Bunnell FL (1995) Forest cover selection and activity of cow moose in summer.  
480 *Acta Theriol* 40:23–36
- 481 Dormann CF, Elith J, Bacher S, et al (2013) Collinearity: a review of methods to deal with it and  
482 a simulation study evaluating their performance. *Ecography* 36:27–46.  
483 <https://doi.org/10.1111/j.1600-0587.2012.07348.x>

- 484 Duchesne T, Fortin D, Courbin N (2010) Mixed conditional logistic regression for habitat  
485 selection studies. *J Anim Ecol* 79:548–555. [https://doi.org/10.1111/j.1365-](https://doi.org/10.1111/j.1365-2656.2010.01670.x)  
486 [2656.2010.01670.x](https://doi.org/10.1111/j.1365-2656.2010.01670.x)
- 487 Duchesne T, Fortin D, Rivest L-P (2015) Equivalence between step selection functions and  
488 biased correlated random walks for statistical inference on animal movement. *PLOS*  
489 *ONE* 10:e0122947. <https://doi.org/10.1371/journal.pone.0122947>
- 490 Dussault C, Ouellet J-P, Courtois R, et al (2004) Behavioural responses of moose to thermal  
491 conditions in the boreal forest. *Écoscience* 11:321–328
- 492 Forester JD, Im HK, Rathouz PJ (2009) Accounting for animal movement in estimation of  
493 resource selection functions: sampling and data analysis. *Ecology* 90:3554–3565.  
494 <https://doi.org/10.1890/08-0874.1>
- 495 Fortin D, Beyer HL, Boyce MS, et al (2005) Wolves influence elk movements: behavior shapes a  
496 trophic cascade in Yellowstone National Park. *Ecology* 86:1320–1330.  
497 <https://doi.org/10.1890/04-0953>
- 498 Fortin D, Fortin M-E, Beyer HL, et al (2009) Group-size-mediated habitat selection and group  
499 fusion–fission dynamics of bison under predation risk. *Ecology* 90:2480–2490.  
500 <https://doi.org/10.1890/08-0345.1>
- 501 Hoegh-Guldberg O, Bruno JF (2010) The impact of climate change on the world’s marine  
502 ecosystems. *Science* 328:1523–1528. <https://doi.org/10.1126/science.1189930>
- 503 Homer C, Dewitz J, Yang L, et al (2015) Completion of the 2011 National Land Cover Database  
504 for the conterminous United States—representing a decade of land cover change  
505 information. *Photogramm Eng Remote Sensing* 81:345–354

- 506 Hovick TJ, Elmore RD, Allred BW, et al (2014) Landscapes as a moderator of thermal extremes:  
507 a case study from an imperiled grouse. *Ecosphere* 5:1–12. <https://doi.org/10.1890/ES13->  
508 00340.1
- 509 Kurylyk BL, MacQuarrie KTB, Linnansaari T, et al (2015) Preserving, augmenting, and creating  
510 cold-water thermal refugia in rivers: concepts derived from research on the Miramichi  
511 River, New Brunswick (Canada). *Ecohydrology* 8:1095–1108.  
512 <https://doi.org/10.1002/eco.1566>
- 513 Ladle A, Avgar T, Wheatley M, et al (2019) Grizzly bear response to spatio-temporal variability  
514 in human recreational activity. *J Appl Ecol* 56:375–386. <https://doi.org/10.1111/1365->  
515 2664.13277
- 516 Lenarz MS, Nelson ME, Schrage MW, Edwards AJ (2009) Temperature mediated moose  
517 survival in northeastern Minnesota. *J Wildl Manage* 73:503–510.  
518 <https://doi.org/10.2193/2008-265>
- 519 Lewis JS, Rachlow JL, Garton EO, Vierling LA (2007) Effects of habitat on GPS collar  
520 performance: using data screening to reduce location error. *J Appl Ecol* 44:663–671.  
521 <https://doi.org/10.1111/j.1365-2664.2007.01286.x>
- 522 Lone K, Beest FM van, Mysterud A, et al (2014) Improving broad scale forage mapping and  
523 habitat selection analyses with airborne laser scanning: the case of moose. *Ecosphere*  
524 5:1–22. <https://doi.org/10.1890/ES14-00156.1>
- 525 Long RA, Bowyer RT, Porter WP, et al (2014) Behavior and nutritional condition buffer a large-  
526 bodied endotherm against direct and indirect effects of climate. *Ecol Monogr* 84:513–  
527 532. <https://doi.org/10.1890/13-1273.1>



- 528 Lowe SJ, Patterson BR, Schaefer JA (2010) Lack of behavioral responses of moose (*Alces alces*)  
529 to high ambient temperatures near the southern periphery of their range. *Can J Zool*  
530 88:1032–1041. <https://doi.org/10.1139/Z10-071>
- 531 Luskick S, Battersby B, Kelty M (1978) Behavioral thermoregulation: orientation toward the sun  
532 in herring gulls. *Science* 200:81–83. <https://doi.org/10.1126/science.635577>
- 533 Martin J, Vourc'h G, Bonnot N, et al (2018) Temporal shifts in landscape connectivity for an  
534 ecosystem engineer, the roe deer, across a multiple-use landscape. *Landscape Ecol*  
535 33:937–954. <https://doi.org/10.1007/s10980-018-0641-0>
- 536 Mason THE, Brivio F, Stephens PA, et al (2017) The behavioral trade-off between  
537 thermoregulation and foraging in a heat-sensitive species. *Behav Ecol* 28:908–918.  
538 <https://doi.org/10.1093/beheco/arx057>
- 539 Mason THE, Stephens PA, Apollonio M, Willis SG (2014) Predicting potential responses to  
540 future climate in an alpine ungulate: interspecific interactions exceed climate effects.  
541 *Glob Change Biol* 20:3872–3882. <https://doi.org/10.1111/gcb.12641>
- 542 McCann NP, Moen RA, Harris TR (2013) Warm-season heat stress in moose (*Alces alces*). *Can*  
543 *J Zool* 91:893–898. <https://doi.org/10.1139/cjz-2013-0175>
- 544 McCann NP, Moen RA, Windels SK, Harris TR (2016) Bed sites as thermal refuges for a cold-  
545 adapted ungulate in summer. *Wildl Biol* 22:228–237. <https://doi.org/10.2981/wlb.00216>
- 546 McGaughey RJ (2016) FUSION/LDV: Software for LIDAR data analysis and visualization. US  
547 Department of Agriculture, Forest Service, Pacific Northwest Research Station, Seattle,  
548 WA, USA
- 549 Melin M, Matala J, Mehtätalo L, et al (2014) Moose (*Alces alces*) reacts to high summer  
550 temperatures by utilizing thermal shelters in boreal forests – an analysis based on

551 airborne laser scanning of the canopy structure at moose locations. *Glob Change Biol*  
552 20:1115–1125. <https://doi.org/10.1111/gcb.12405>

553 Merkle JA, Monteith KL, Aikens EO, et al (2016) Large herbivores surf waves of green-up  
554 during spring. *Proc Royal Soc Lond B Biol Sci* 283:20160456.  
555 <https://doi.org/10.1098/rspb.2016.0456>

556 MesoWest. <http://mesowest.utah.edu/cgi-bin/droman/mesomap.cgi?state=MN&rawsflag=3>.  
557 Accessed 27 Apr 2018

558 Middleton AD, Merkle JA, McWhirter DE, et al (2018) Green-wave surfing increases fat gain in  
559 a migratory ungulate. *Oikos* 127:1060–1068. <https://doi.org/10.1111/oik.05227>

560 Minnesota Department of Natural Resources. In: Minnesota Normal Annual Snowfall: 1981-  
561 2010.  
562 [https://www.dnr.state.mn.us/climate/summaries\\_and\\_publications/normals\\_snow\\_1981\\_](https://www.dnr.state.mn.us/climate/summaries_and_publications/normals_snow_1981_)  
563 2010.html. Accessed 27 Apr 2018

564 Minnesota Geospatial Information Office.  
565 [http://www.mngeo.state.mn.us/committee/elevation/mn\\_elev\\_mapping.html](http://www.mngeo.state.mn.us/committee/elevation/mn_elev_mapping.html). Accessed  
566 27 Apr 2018

567 Moen R, Pastor J, Cohen Y, Schwartz CC (1996) Effects of moose movement and habitat use on  
568 GPS collar performance. *J Wildl Manage* 60:659–668. <https://doi.org/10.2307/3802085>

569 Monteith KL, Klaver RW, Hersey KR, et al (2015) Effects of climate and plant phenology on  
570 recruitment of moose at the southern extent of their range. *Oecologia* 178:1137–1148.  
571 <https://doi.org/10.1007/s00442-015-3296-4>

- 572 Montgomery RA, Redilla KM, Moll RJ, et al (2019) Movement modeling reveals the complex  
573 nature of the response of moose to ambient temperatures during summer. *J Mammal*  
574 100:169–177. <https://doi.org/10.1093/jmammal/gyy185>
- 575 National Oceanic and Atmospheric Administration. In: Data Tools: 1981-2010 Normals.  
576 <https://www.ncdc.noaa.gov/cdo-web/datatools/normals>. Accessed 27 Apr 2018
- 577 O'Brien RM (2007) A caution regarding rules of thumb for variance inflation factors. *Qual*  
578 *Quant* 41:673–690. <https://doi.org/10.1007/s11135-006-9018-6>
- 579 Owen-Smith N (1998) How high ambient temperature affects the daily activity and foraging time  
580 of a subtropical ungulate, the greater kudu (*Tragelaphus strepsiceros*). *J Zool* 246:183–  
581 192. <https://doi.org/10.1111/j.1469-7998.1998.tb00147.x>
- 582 Parmesan C (2006) Ecological and Evolutionary Responses to Recent Climate Change. *Annu*  
583 *Rev Ecol Evol Syst* 37:637–669.  
584 <https://doi.org/10.1146/annurev.ecolsys.37.091305.110100>
- 585 Pastor J, Mladenoff DJ (1992) The southern boreal-northern hardwood forest border: a systems  
586 analysis of the global boreal forest. Cambridge University Press, Cambridge, UK
- 587 Pörtner HO, Farrell AP (2008) Physiology and climate change. *Science* 322:690–692.  
588 <https://doi.org/10.1126/science.1163156>
- 589 Prokopenko CM, Boyce MS, Avgar T (2017) Characterizing wildlife behavioural responses to  
590 roads using integrated step selection analysis. *J Appl Ecol* 54:470–479.  
591 <https://doi.org/10.1111/1365-2664.12768>
- 592 R Core Team (2018) R: A language and environment for statistical computing. R Foundation for  
593 Statistical Computing, Vienna, Austria

- 594 Rempel RS (2011) Effects of climate change on moose populations: exploring the response  
595 horizon through biometric and systems models. *Ecol Model* 222:3355–3365.  
596 <https://doi.org/10.1016/j.ecolmodel.2011.07.012>
- 597 Renecker LA, Hudson RJ (1986) Seasonal energy expenditures and thermoregulatory responses  
598 of moose. *Can J Zool* 64:322–327. <https://doi.org/10.1139/z86-052>
- 599 Renecker LA, Hudson RJ (1989) Seasonal activity budgets of moose in aspen-dominated boreal  
600 forests. *J Wildl Manage* 53:296–302. <https://doi.org/10.2307/3801126>
- 601 Roffe TJ, Coffin K, Berger J (2001) Survival and immobilizing moose with carfentanil and  
602 xylazine. *Wildl Soc Bull* 29:1140–1146
- 603 Sargeant GA, Eberhardt LE, Peek JM (1994) Thermoregulation by mule deer (*Odocoileus*  
604 *hemionus*) in arid rangelands of southcentral Washington. *J Mammal* 75:536–544.  
605 <https://doi.org/10.2307/1382578>
- 606 Sarmiento W, Biel M, Berger J (2019) Seeking snow and breathing hard – behavioral tactics in  
607 high elevation mammals to combat warming temperatures. *PLOS One* 14:.  
608 <https://doi.org/10.1371/journal.pone.0225456>
- 609 Schwab FE, Pitt MD (1991) Moose selection of canopy cover types related to operative  
610 temperature, forage, and snow depth. *Can J Zool* 69:3071–3077.  
611 <https://doi.org/10.1139/z91-431>
- 612 Shrestha AK, van Wieren SE, van Langevelde F, et al (2014) Larger antelopes are sensitive to  
613 heat stress throughout all seasons but smaller antelopes only during summer in an African  
614 semi-arid environment. *Int J Biometeorol* 58:41–49. [https://doi.org/10.1007/s00484-012-](https://doi.org/10.1007/s00484-012-0622-y)  
615 [0622-y](https://doi.org/10.1007/s00484-012-0622-y)

- 616 Sikes RS, Animal Care and Use Committee of the American Society of Mammalogists (2011)  
617 2011 guidelines of the American Society of Mammalogists for the use of wild mammals  
618 in research and education. *J Mammal* 92:235–253.  
619 <https://doi.org/10.1093/jmammal/gyw078>
- 620 Stelzner JK (1988) Thermal effects on movement patterns of yellow baboons. *Primates* 29:91–  
621 105. <https://doi.org/10.1007/BF02380852>
- 622 Street GM, Fieberg J, Rodgers AR, et al (2016) Habitat functional response mitigates reduced  
623 foraging opportunity: implications for animal fitness and space use. *Landscape Ecol*  
624 31:1939–1953. <https://doi.org/10.1007/s10980-016-0372-z>
- 625 Street GM, Rodgers AR, Fryxell JM (2015) Mid-day temperature variation influences seasonal  
626 habitat selection by moose. *J Wildl Manage* 79:505–512.  
627 <https://doi.org/10.1002/jwmg.859>
- 628 Sunday JM, Bates AE, Kearney MR, et al (2014) Thermal-safety margins and the necessity of  
629 thermoregulatory behavior across latitude and elevation. *PNAS* 201316145.  
630 <https://doi.org/10.1073/pnas.1316145111>
- 631 Thurfjell H, Ciuti S, Boyce MS (2014) Applications of step-selection functions in ecology and  
632 conservation. *Movement Ecol* 2:4. <https://doi.org/10.1186/2051-3933-2-4>
- 633 van Beest FM, Van Moorter B, Milner JM (2012) Temperature-mediated habitat use and  
634 selection by a heat-sensitive northern ungulate. *Anim Behav* 84:723–735.  
635 <https://doi.org/10.1016/j.anbehav.2012.06.032>
- 636 Vierling KT, Vierling LA, Gould WA, et al (2008) Lidar: shedding new light on habitat  
637 characterization and modeling. *Frontiers Ecol Environ* 6:90–98.  
638 <https://doi.org/10.1890/070001>

- 639 Vrahimis S, Kok OB (1993) Daily activity of black wildebeest in a semi-arid environment. *Afr J*  
640 *Ecol* 31:328–336. <https://doi.org/10.1111/j.1365-2028.1993.tb00545.x>
- 641 Walther G-R, Post E, Convey P, et al (2002) Ecological responses to recent climate change.  
642 *Nature* 416:389–395. <https://doi.org/10.1038/416389a>
- 643

644 **Figures**

645 **Fig. 1** The physical characteristics of the surrounding environment greatly influence the thermal landscape for animals. Fig. 1A  
646 represents an environment (conifer forest) where heat gain may be decreased by reducing exposure to radiation, Fig. 1B represents an  
647 environment (marsh) where heat loss may be increased by conduction, and Fig. 1C represents an environment (clear cut) that offers  
648 neither relief from radiation nor opportunities to disperse heat via conduction. Moose likely face tradeoffs between forage availability  
649 and thermal relief.

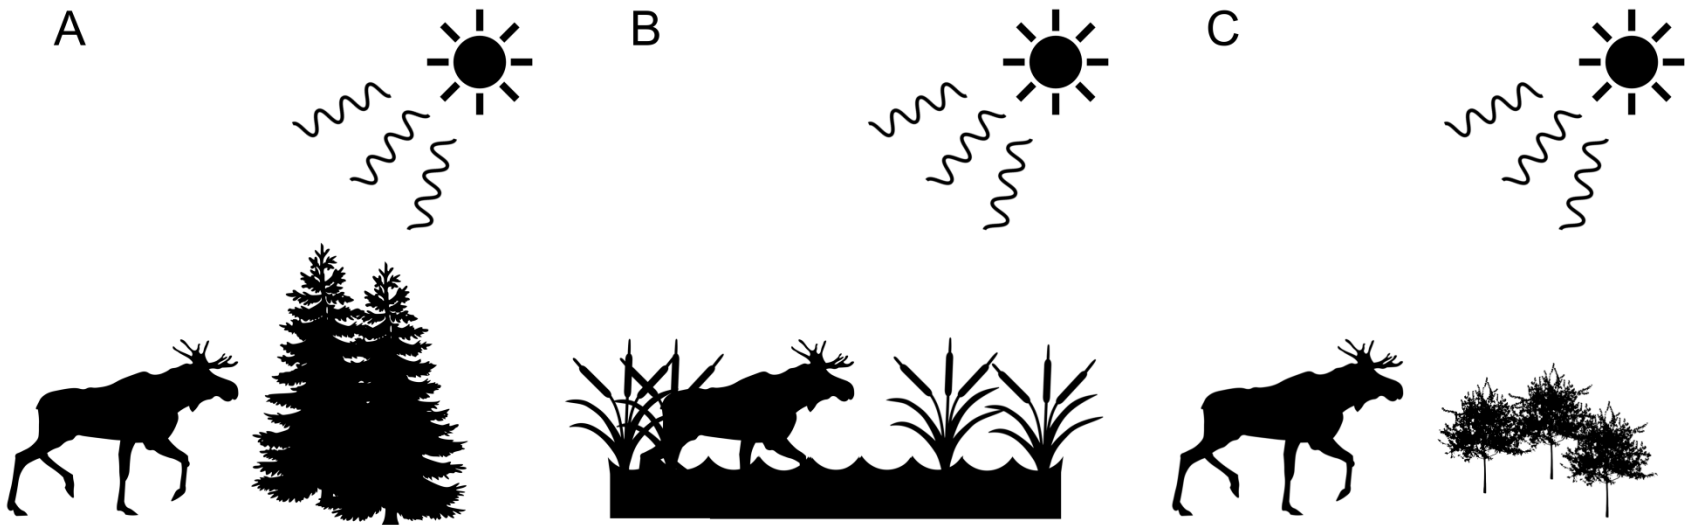

650

651

652 **Fig. 2** Interaction plots showing relationships for significant interactions between temperature and relative selection strengths (RSS) of  
653 variables of interest (A: Step length and temperature, B: Shade and temperature, C: Distance to bog and temperature, D: Distance to  
654 mixed forest and temperature). High temperatures decrease the odds of longer step lengths, increase the odds of seeking shade, and  
655 increase the odds of traveling in bogs and mixed forest. In some cases (A, B, and C), patterns of behavior at low temperatures reversed  
656 into patterns of the opposite behavior at high temperatures (e.g., moose strongly avoid shade at 0°C while strongly selecting for shade  
657 at 30°C).

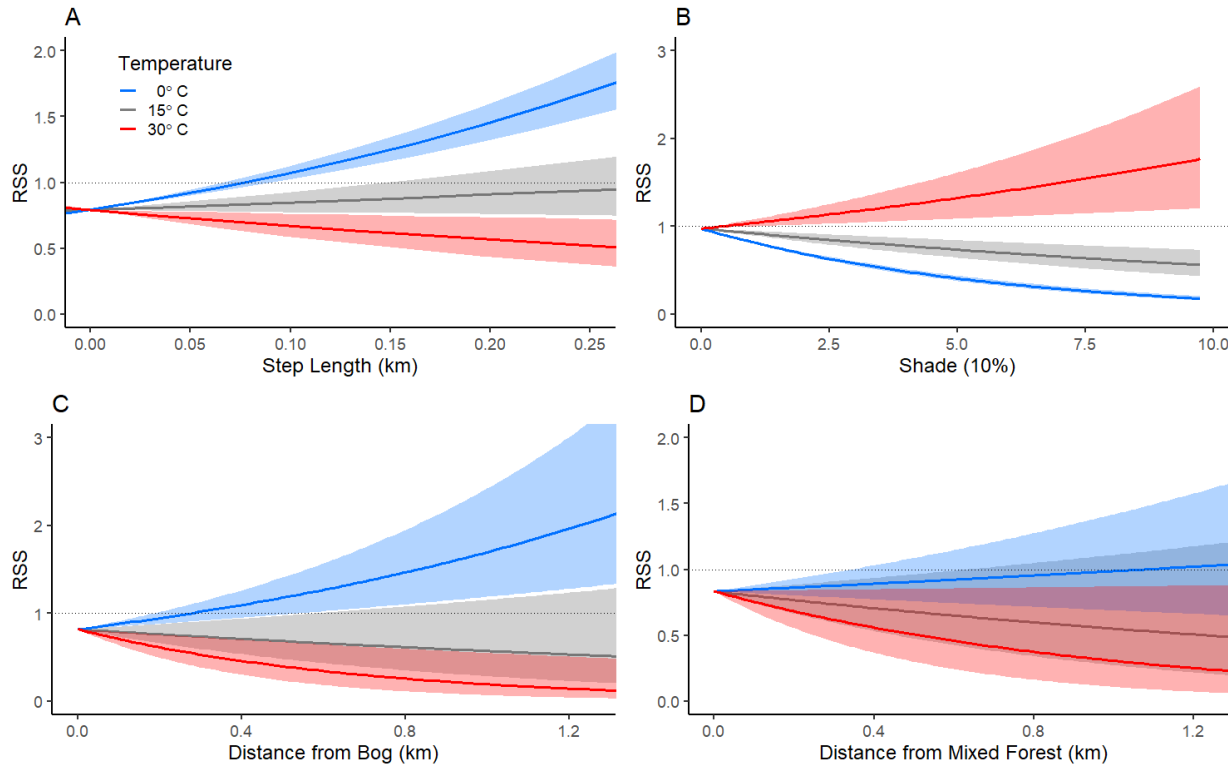

658



659 **Tables**

660 **Table 1** Variables incorporated in the step-selection function of moose movement and habitat selection and justification for inclusion  
 661 in the model.

| <b>Name</b> | <b>Variable</b>            | <b>Description</b>                                                                                                                                                                                                                                         |
|-------------|----------------------------|------------------------------------------------------------------------------------------------------------------------------------------------------------------------------------------------------------------------------------------------------------|
| Shade       | Canopy Vegetation Density  | Proportion of all lidar returns above 3 meters; analogous to canopy vegetation density, a proxy for shade                                                                                                                                                  |
| dBog        | Distance to Bog            | Distance to woody wetlands; included in analyses because bogs have both canopy cover and ground moisture                                                                                                                                                   |
| dMarsh      | Distance to Marsh          | Distance to emergent herbaceous wetlands; included in analyses because moose are often observed in marshes, and water can disperse heat via conduction, convection, and evaporation                                                                        |
| dWater      | Distance to Open Water     | Distance to open water; included in analyses because moose are often seen in bodies of water, which can disperse heat via conduction, convection, and evaporation                                                                                          |
| dConifer    | Distance to Conifer Forest | Distance to conifer forest; included in analyses because conifer forest contains localized thick canopy cover                                                                                                                                              |
| dMixed      | Distance to Mixed Forest   | Distance to mixed forest; included in analyses because conifers offer localized thick canopy cover while deciduous trees offer foraging opportunities                                                                                                      |
| StepLength  | Step Length                | Distance between a moose location and the location immediately prior; included in analyses to account for bias in the parametric distribution of step lengths used to characterize available points and to estimate how temperature affects movement rates |
| Temp        | Temperature                | Temperature at the nearest NOAA weather station at the time of a location; included in analyses to estimate how temperature affects habitat use and movement rates                                                                                         |

**Table 2** Coefficient estimates, standard errors, relative selection strengths, 95% confidence intervals, and p-values for the step-selection function. Bold variables denote significance at  $\alpha = 0.05$ .

| <i>Variable</i>        | <i>Coefficient</i> | <i>Robust SE</i> | <i>RSS</i>    | <i>RSS LCL</i> | <i>RSS UCL</i> | <i>p</i>         |
|------------------------|--------------------|------------------|---------------|----------------|----------------|------------------|
| <b>Shade</b>           | <b>-0.174</b>      | <b>0.007</b>     | <b>0.840</b>  | <b>0.829</b>   | <b>0.852</b>   | <b>&lt;0.001</b> |
| <b>dBog</b>            | <b>0.728</b>       | <b>0.182</b>     | <b>2.071</b>  | <b>1.450</b>   | <b>2.956</b>   | <b>&lt;0.001</b> |
| dMarsh                 | -0.055             | 0.108            | 0.947         | 0.767          | 1.169          | 0.612            |
| dWater                 | 0.057              | 0.106            | 1.058         | 0.860          | 1.302          | 0.592            |
| <b>dConifer</b>        | <b>0.440</b>       | <b>0.161</b>     | <b>1.553</b>  | <b>1.133</b>   | <b>2.130</b>   | <b>0.006</b>     |
| dMixed                 | 0.169              | 0.184            | 1.184         | 0.825          | 1.699          | 0.359            |
| <b>StepLength</b>      | <b>3.025</b>       | <b>0.242</b>     | <b>20.603</b> | <b>12.831</b>  | <b>33.082</b>  | <b>&lt;0.001</b> |
| <b>Shade*Temp</b>      | <b>0.008</b>       | <b>0.000</b>     | <b>1.008</b>  | <b>1.007</b>   | <b>1.009</b>   | <b>&lt;0.001</b> |
| <b>dBog*Temp</b>       | <b>-0.072</b>      | <b>0.012</b>     | <b>0.930</b>  | <b>0.909</b>   | <b>0.952</b>   | <b>&lt;0.001</b> |
| dMarsh*Temp            | 0.004              | 0.007            | 1.004         | 0.990          | 1.019          | 0.558            |
| dWater*Temp            | -0.004             | 0.007            | 0.996         | 0.982          | 1.010          | 0.589            |
| dConifer*Temp          | -0.009             | 0.010            | 0.991         | 0.972          | 1.011          | 0.388            |
| <b>dMixed*Temp</b>     | <b>-0.039</b>      | <b>0.012</b>     | <b>0.962</b>  | <b>0.940</b>   | <b>0.984</b>   | <b>0.001</b>     |
| <b>StepLength*Temp</b> | <b>-0.156</b>      | <b>0.014</b>     | <b>0.855</b>  | <b>0.832</b>   | <b>0.879</b>   | <b>&lt;0.001</b> |

## Appendix A: Supplementary Data

**Fig. A1** Comparison of temperatures at the two weather stations used in this study (KCKC in Grand Marais and KBFW in Silver Bay). The red line indicates a 1:1 relationship. Temperatures at KCKC followed the regression line  $1.74 + 0.821 \cdot \text{KBFW}$ , where “KBFW” indicates the temperature at the KBFW station.  $R^2 = 0.881$  for the regression equation. Temperatures were thus slightly warmer at KCKC at very low temperatures (less than  $\sim 2^\circ\text{C}$ ), but usually slightly cooler (e.g., when it was  $30^\circ\text{C}$  at KBFW, the expected temperature at KCKC was  $26.4^\circ\text{C}$ ). Variation in temperature on the landscape was thus much smaller than temperature across the day or summer.

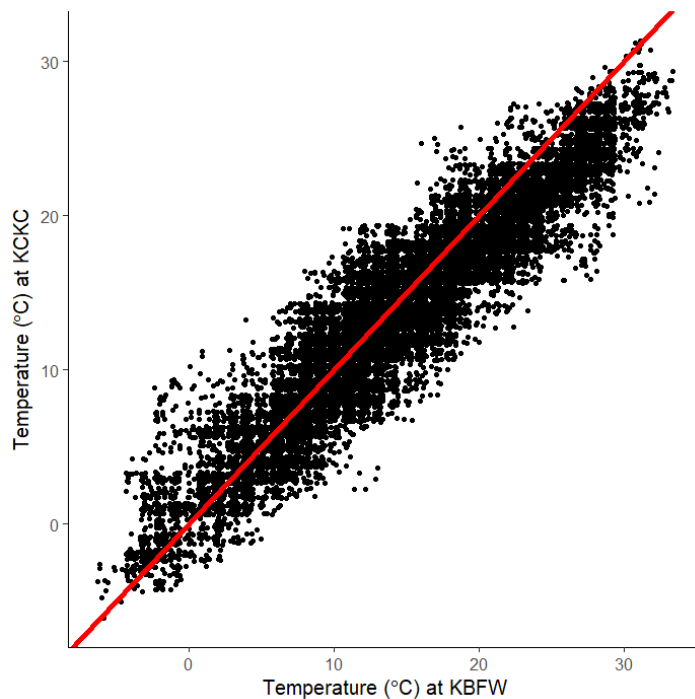

**Fig. A2** Lowess regression of mean step length across times of day (20 min. increments). The gray ribbon represents the 95% confidence interval for the regression line. Moose movement rates varied slightly but consistently over the course of the day, with movement rates peaking during crepuscular periods. The area within the dotted rectangles represents the range of civil sunrise and sunset at the centroid of our study area during our study period (determined using the NOAA Solar Calculator tool [<https://www.esrl.noaa.gov/gmd/grad/solcalc/>]).

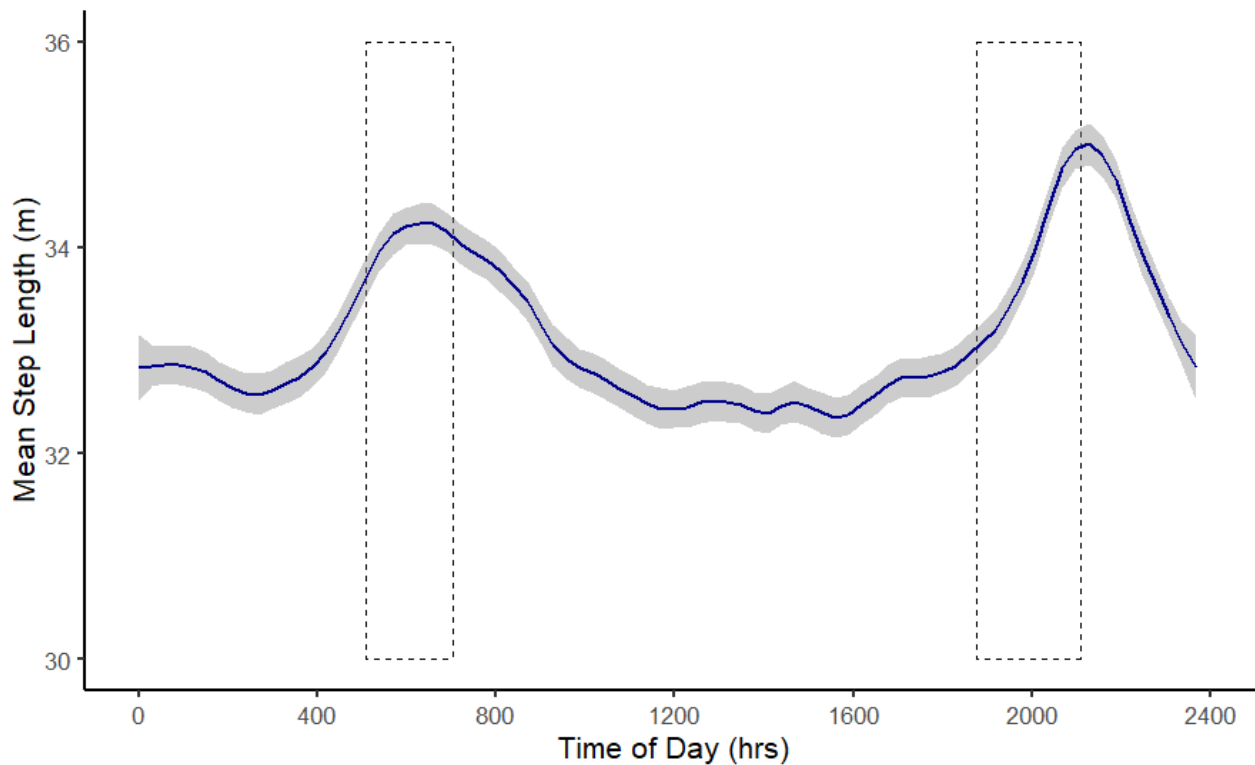

**Fig. A3** Boxplots showing monthly changes in distance to cover types of interest (A: Distance to bog, B: Distance to marsh, C: Distance to water, D: Distance to conifer forest, E: Distance to mixed forest). Month-to-month differences in habitat use are small, indicating that patterns observed from our SSF reflect habitat selection throughout our study period and are not influenced by one-time phenological events occurring during our study period (e.g., parturition movements by females during May, or the emergence of aquatic plants during June).

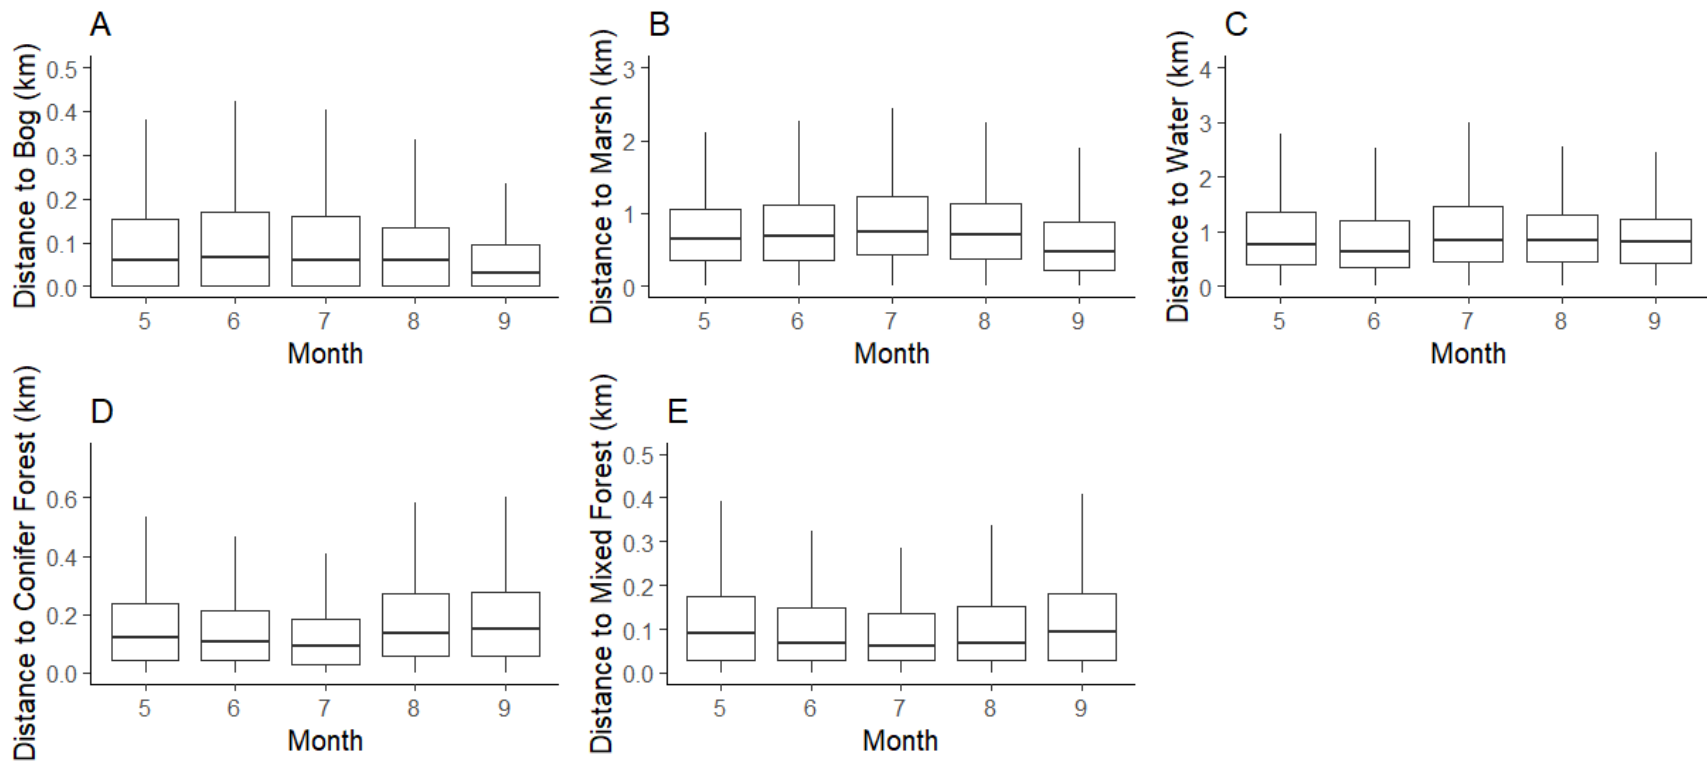

**Fig. A4** Interaction plots showing relationships for significant interactions between temperature and relative selection strengths (RSS) of variables of interest (A: Step length and temperature, B: Shade and temperature, C: Distance to bog and temperature, D: Distance to mixed forest and temperature) at progressively longer intervals between GPS locations (1: 20-minute, 2: 1-hour, 3: 2-hour, and 4: 4-hour). Patterns in the selection strength of interactions progressively weaken as the interval between GPS locations increases, in part explaining why other studies have not found consistent effects of temperature on moose movement.

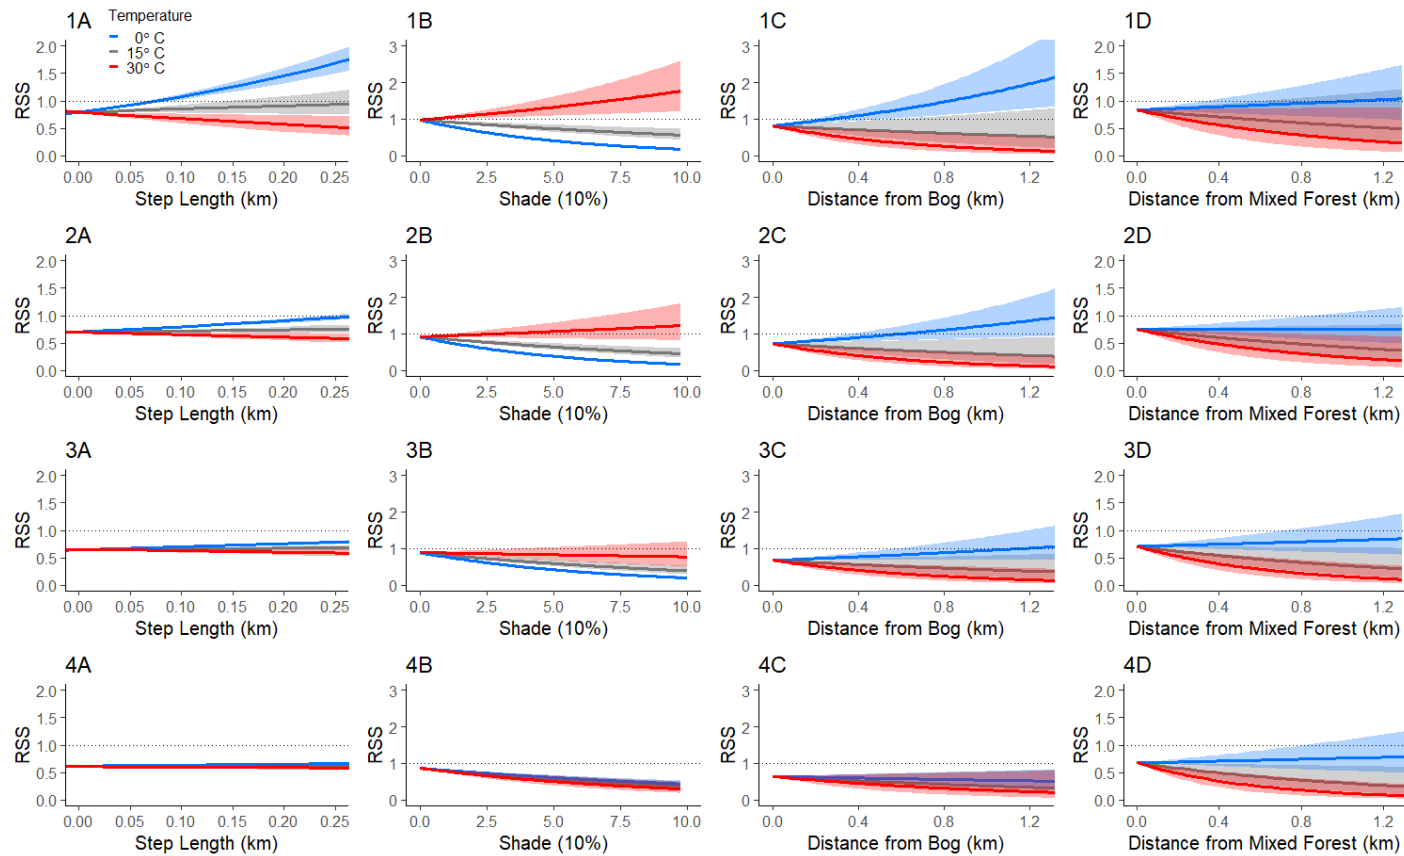

Source: https://www.biorxiv.org/content/10.1101/790048v2.full.pdf
